# Supplementary material
Source: Springer Nature journal article supplement (https://www.springerprofessional.de/resource/supplementary/13638_2014_1052_MOESM22_ESM.pdf/11898858)

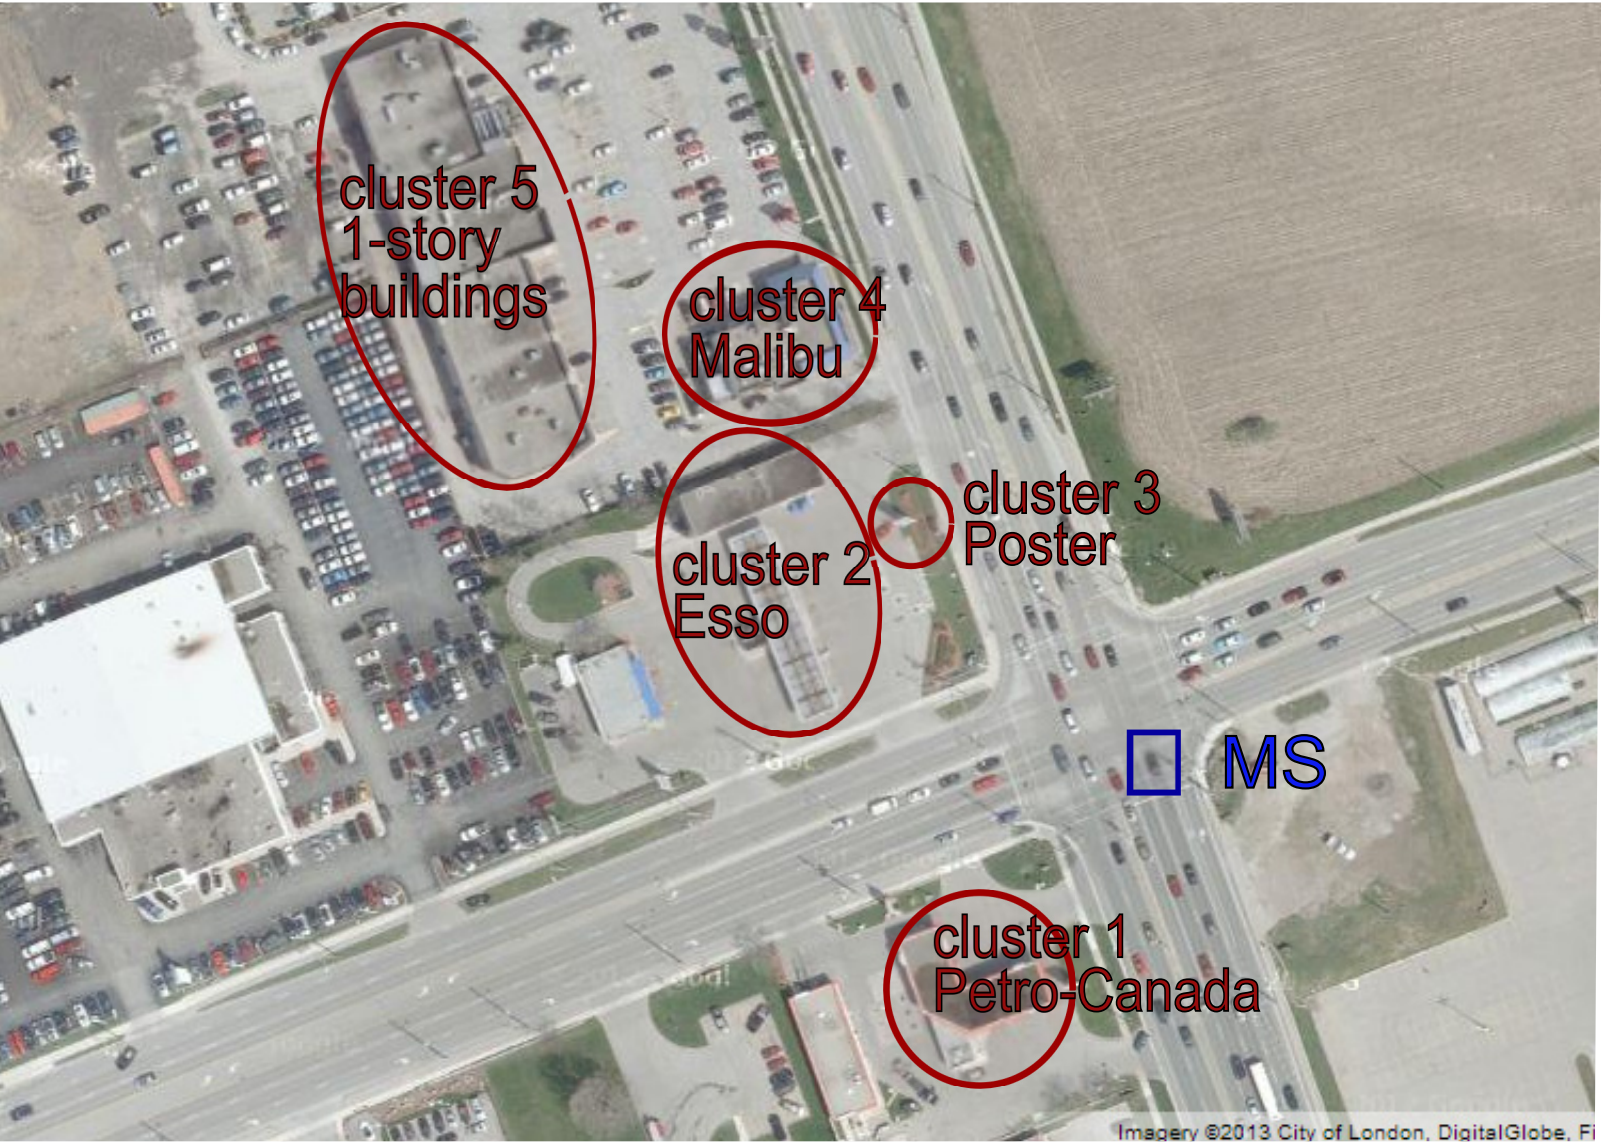

cluster 5  
1-story  
buildings

cluster 4  
Malibu

cluster 2  
Esso

cluster 3  
Poster

cluster 1  
Petro-Canada

MS

Supplement: MOESM22 [file 11898858]
